# Supplementary material
Source: Springer Nature journal article supplement (https://www.springermedizin.de/resource/supplementary/12958_2003_125_MOESM3_ESM.pdf/9566174)

**A**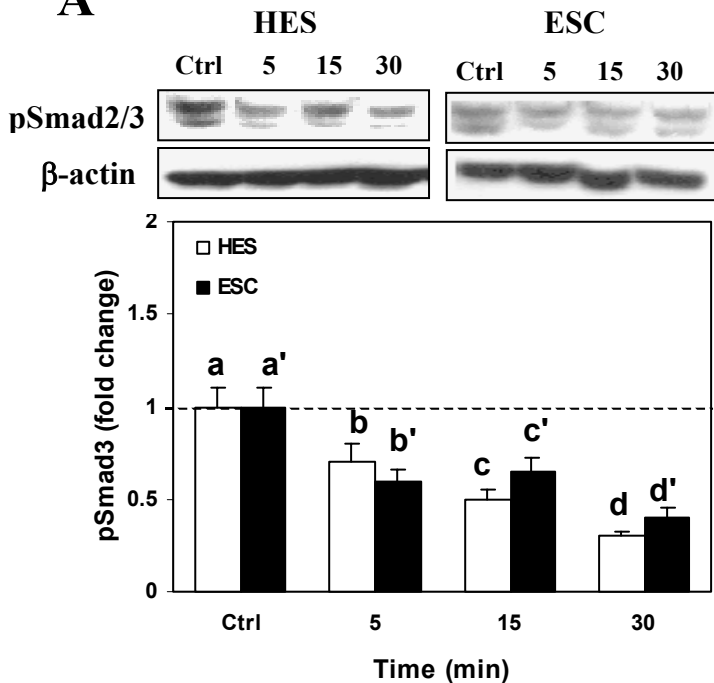**B**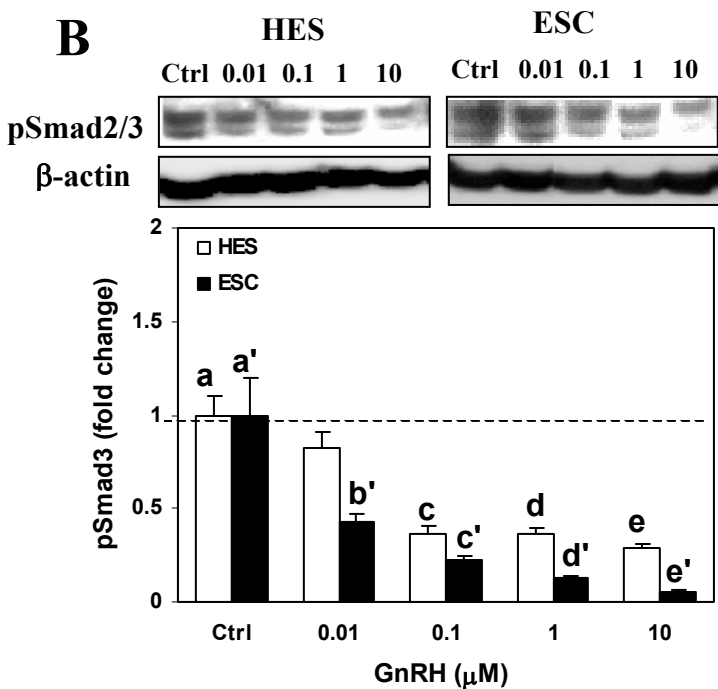

Supplement: MOESM3 [file 9566174]
